# Supplementary material
Source: publisher figshare collection journal article supplement (https://frontiersin.figshare.com/ndownloader/files/11184668)
Supplement: Supplementary file 1 [file 11184668]

**Table 2. Uses of chiles as medicine in Mesoamerica and Aridoamerica Landscapes in the Neotropics. Data comes from different sources that validate the ancestral and modern use of chiles by different cultures (see supplemental references). The language classification is based on De Avila (2008) and each language represents a culture, although there are linguistic variants that can be sum up to 364 different indigenous cultures. Out of 58 indigenous cultures, only 38 have available data for our purposes. The others are poorly studied.**

| Native culture named by their language name (Spanish) | Use of chiles for cultural bound illnesses, magical-religious events | Use of chiles as food | Use of chiles as medicine by ancient* and modern cultures |
| --- | --- | --- | --- |
| Kiliwa |  | Cookbook (Flores, 2000) |  |
| Cucapá |  | Cookbook  (Flores, 2000) |  |
| Chontal of Oaxaca |  | Ethnographic study (Oceguera, 2004) |  |
| Huave | magical-religious events during marriage (Millán, 2007) | Cookbook (Flores, 2010) |  |
| Huastec | cultural bound illnesses, magical-religious events (Alcorn, 1984) | Cookbook (Güemes and Aguilar-Meléndez, in press) | Eye-related disorders (Alcorn, 1984*; Fiedor and Burda, 2014; Sousa et al., 2016)  Dermatological conditions (Alcorn, 1984*; Sharma et al., 2013) |
| Maya yucatec | cultural bound illnesses, magical-religious events (Roys, 1931) | Cookbook (Ferrer, 1999) | Cardiovascular diseases  (Fiedor and Burda, 2014; Roys, 1931*; Sousa et al., 2016)  Pain relief and rheumatic and neuropathic pain  (Roys, 1931*; Sharma et al., 2013)  Gastrointestinal system (Roys, 1931*; Sharma et al., 2013)  Urinary bladder (Roys, 1931*; Sharma et al., 2013)  Respiratory conditions  and asthma(Roys, 1931*; Sharma et al., 2013)  Labor pains and delivery(Roys, 1931*; Sharma et al., 2013) |
| Lacandón |  | Cookbook (Mayorga and Sánchez, 2000) |  |
| Tzeltal |  | Cookbook (Mayorga and Sánchez, 2000) |  |
| Tzotzil | cultural bound illnesses, magical-religious events (Breedlove and Laughlin, 1993) | Cookbook (Mayorga and Sánchez, 2000) | Dermatological conditions (Breedlove and Laughlin, 1993*; Sharma et al., 2013) |
| Motozintleco |  | Cookbook (Mayorga and Sánchez, 2000) |  |
| Tojolabal |  | Cookbook (Mayorga and Sánchez, 2000) |  |
| Mam |  | Cookbook (Mayorga and Sánchez, 2000) |  |
| Teco |  |  |  |
| Zoque |  | Cookbook (Mayorga and de la Cruz, 2000) |  |
| Mixe |  | Cookbook (Pérez, 2004) | Documented (Leonti et al., 2003) |
| Pame |  | Cookbook (Bassler, 2000) |  |
| Otomi | cultural bound illnesses and agriculture magical-religious events (Long-Solís, 1986) | Cookbook (Latapí, 2015) |  |
| Mazahua |  | Cookbook (Cruz, 2004) |  |
| Matlatzinca |  | Cookbook (M. and H., 2012) |  |
| Chinantec | magical-religious events during funeral (Long-Solís, 1986) | Cookbook (Hernández and Merlín, 2000) |  |
| Tlapaneco | cultural bound illnesses, magical-religious events and protection (Dehouve, in press) | Cookbook (Dehouve, in press) |  |
| Amuzgo |  | Cookbook (González, 2004) |  |
| Mixtec | cultural bound illnesses, magical-religious eventsand protection (Katz, in press) | Cookbook (Katz, in press) |  |
| Cuicatec | Fieldwork | Cookbook (Anónimo, 2010) |  |
| Popoloca | magical-religious events (Gámez, 2003) | Cookbook (Gámez, 2003) |  |
| Chocholtec | magical-religious events (Andrade, 2000) | Cookbook (Andrade, 2000) |  |
| Mazatec |  | Cookbook (Merlín and Hernández, 2000) |  |
| Chatino |  |  |  |
| Zapotec | cultural bound illnesses (Nadia C. Ruiz Núñez and Marco Antonio Vásquez-Dávia, in press) | Cookbook (Ruiz and Vásquez, in press) | Eye-related disorders (Fiedor and Burda, 2014; Frei et al., 1998*; Sousa et al., 2016) |
| Purépecha | cultural bound illnesses (comm. Pers. Marín Villanueva), magical-religious events (Márquez et al., 2000) | Cookbook (Márquez et al., 2000) |  |
| Totonac | cultural bound illnesses (Madero, 2000) | Cookbook (Madero, 2000) | Pain relief and rheumatic and neuropathic pain  (Madero, 2000*; Sharma et al., 2013)  Respiratory conditions  and asthma(Madero, 2000*; Sharma et al., 2013) |
| Tepehua |  | Cookbook |  |
| Pima bajo |  |  | Antibacterial(Acero-Ortega et al., 2005; Oseguera-Montiel, 2013*)  Nematicide (Oseguera-Montiel, 2013*; Rakhshandehroo et al., 2016) |
| Tepehuán of the north |  | Cookbook (Rivas and Solís, 2000) |  |
| Tepehuán of the south |  | Cookbook (Rivas and Solís, 2000) |  |
| Tarahumara |  | Cookbook (Mares, 1999) |  |
| Mayo |  | Cookbook (Buitimea, 2000) |  |
| Yaqui |  | Cookbook (Buitimea, 2000) |  |
| Huichol |  | Cookbook (Medina Ávila, 2000) |  |
| Nahua | cultural bound illnesses, magical-religious events (Long-Solís, 1986) | Cookbook (Long-Solís, 1986) | Pain relief and rheumatic and neuropathic pain  ( Long-Solís, 1986*; López Austin, 1972*; Sharma et al., 2013)  Gastrointestinal system ( López Austin, 1972*; Sharma et al., 2013)  Urinary bladder ( López Austin, 1972*; Sharma et al., 2013)  Respiratory conditions  and asthma( López Austin, 1972*; Sharma et al., 2013)  Nematicide (Long-Solís, 1986*; Rakhshandehroo et al., 2016) |

REFERENCES OF TABLE 2

Acero-Ortega, C., Dorantes-Alvarez, L., Hernandez-Sanchez, H., Gutiérrez-López, G., Aparicio, G., and Jaramillo-Flores, M. E. (2005). Evaluation of phenylpropanoids in ten Capsicum annuum L. varieties and their inhibitory effects on Listeria monocytogenes Murray, Webb and Swann Scott A. *Rev. Agaroquimica Tecnol. Aliment.* 11, 5–10. <https://doi.org/10.1177/1082013205050902>

Alcorn, J. B. (1984). Huastec Mayan ethnobotany. Austin, Texas: University of Texas Press. PMCid:PMC1442547

de Avila B. A. (2008). “La diversidad lingüística y el conocimiento etnobiológico,” in *Capital natural de México. Vol. I: Conocimiento actual de la biodiversidad.* (CONABIO), 497–556.

Andrade, T. C. (2000). *Recetario chocholteco de Oaxaca*. Dirección General de Culturas Populares, Consejo Nacional para la Cultura y las Artes.

Anónimo (2010). *Arte de cosina según el uso de la provincia (de Oajaca) año de 1829.* , eds. Carlos Sánchez Silva and Esteban San Juan Maldonado Oaxaca: INAH, Carteles Editores y Provedora Gráfica de Oaxaca, S. A. de C.V.

Bassler, H. C. (2000). *Recetario pame de San Luis Potosí y Querétaro*. México: Dirección General de Culturas Populares, Consejo Nacional para la Cultura y las Artes.

Breedlove, D. E., and Laughlin, R. M. (1993). *The flowering of man: a Tzotzil botany of Zinacantan. Volumes 1 and 2*. Washington, D.C.: Smithsonian Institution Press.

Buitimea, R. Y. (2000). *Recetario indígena de Sonora*. México: Dirección General de Culturas Populares, Consejo Nacional para la Cultura y las Artes.

Cruz, D. F. (2004). Gastronomía cotidiana y festiva de la etnia Mazahua del Noroeste del Estado de Mexico en el Municipio de San Felipe del Progreso.

Dehouve, D. (in press). “El uso ritual del chiltepín entre los tlapanecos (Me´phaa) del estado de Guerrero (México),” in *Los chiles que le dan sabor al mundo. Contribuciones multidisciplinarias.* (Xalapa, Veracruz, México: Universidad Veracruzana, ITAO e IRD).

Ferrer G. J. C. (1999). *Recetario maya de Quintana Roo*. México: Dirección General de Culturas Populares, Consejo Nacional para la Cultura y las Artes.

Fiedor, J., and Burda, K. (2014). Potential role of carotenoids as antioxidants in human health and disease. Nutrients 6, 466–488. <https://doi.org/10.3390/nu6020466>

Flores, I. P. (2000). *Recetario indígena de Baja California*. Consejo Nacional para la Cultura y las Artes.

Flores U. J. (2010). *¡Mucho gusto!: gastronomía y turismo cultural en el Istmo de Tehuantepec.* México: CONACULTA.

Frei, B., Baltisberger, M., Sticher, O., and Heinrich, M. (1998). Medical ethnobotany of the Zapotecs of the Isthmus-Sierra (Oaxaca, Mexico): Documentation and assessment of indigenous uses. *J. Ethnopharmacol.* 62, 149–165. doi: <https://doi.org/10.1016/S0378-8741(98)00051-8>

Gámez, A. (2003). *El ciclo agrícola ritual en una comunidad popoloca del sur de Puebla*.

Güemes J. R. and Aguilar-Meléndez, A. (in press). “Etnobotánica Nahua del chile en la Huasteca Meridional,” in *Los chiles que le dan sabor al mundo. Contribuciones multidisciplinarias.* (Xalapa, Veracruz, México: Universidad Veracruzana, ITAO e IRD).

Hernández L.J. and Merlín A. R. (2000). *Recetario chinanteco de Oaxaca*. México: Dirección General de Culturas Populares, Consejo Nacional para la Cultura y las Artes.

Josefina Rivas Vega, and Yolanda Solís Arellano y Alfonso (2000). *Recetario tepehuano de Chihuahua y Durango*. México: Dirección General de Culturas Populares, Consejo Nacional para la Cultura y las Artes.

Katz, E. (in press). “El chile en la Mixteca Alta (oaxaca): de la comida al ritual,” in *Los chiles que le dan sabor al mundo. Contribuciones multidisciplinarias.* (Xalapa, Veracruz, México: Universidad Veracruzana, ITAO e IRD).

Latapí Lopez, Hector (2015). *Voces y sabores dela cocina otomi de Querétaro*. México: Consejo Nacional para la Cultura y las Artes.

Leonti, M., Sticher, O., and Heinrich, M. (2003). Antiquity of medicinal plant usage in two Macro-Mayan ethnic groups (Mexico). *J. Ethnopharmacol.* 88, 119–124. doi: <https://doi.org/10.1016/S0378-8741(03)00188-0>

Long-Solís, J. (1986). *Capsicum y cultura: la historia del chilli*. México, D. F.: Fondo de Cultura Económica.

López Austin, A. (1972). Textos acerca de las partes del cuerpo humano y de las enfermedades y medicinas en los Primeros Memoriales de Sahagun. *Estud. Cult. Nahuatl* 10, 129–153. PMid:11638759

M., C. N., and H., F. C. (2012). *Gastronomía y turismo. Diseño de indicadores, políticas y cultura.* México: Universidad Autónoma del Estado de México.

Madero, R. A. (2000). *Recetario totonaco de la costa de Veracruz*. Dirección General de Culturas Populares, Consejo Nacional para la Cultura y las Artes. PMCid:PMC97370

Mares Trías, A. (1999). *Comida de los Tarahumaras*. México: Dirección General de Culturas Populares, Consejo Nacional para la Cultura y las Artes.

Márquez, J. S. M., Agustín, M. R. M., and Martínez, E. T. (2000). *Recetario de las atápakuas purépechas*. Dirección General de Culturas Populares, Consejo Nacional para la Cultura y las Artes.

Mayorga M.F., and de la Cruz, S. (2000). *Recetario zoque de Chiapas*. México: Dirección General de Culturas Populares, Consejo Nacional para la Cultura y las Artes.

Mayorga M. F., and Sánchez, A. F. (2000). *Recetario indígena de Chiapas*. México: Consejo Nacional para la Cultura y las Artes.

Medina Á. J. R. (2000). *Recetario huichol de Nayarit*. México: Dirección General de Culturas Populares, Consejo Nacional para la Cultura y las Artes.

Merlín A. R. and Hernández L. J. (2000). *Recetario mazateco de Oaxaca*. México: Dirección General de Culturas Populares, Consejo Nacional para la Cultura y las Artes.

Millán, S. (2007). *El cuerpo de la nube: jerarquía y simbolismo ritual en la cosmovisión de un pueblo huave*. México: Instituto Nacional de Antropología e Historia.

Oceguera, A. (2004). *Chontales de Oaxaca*. México, D.F.: CDI.

Oseguera-Montiel, A. (2013). *La persistencia de la costumbre pima. Interpretaciones desde la antropología cognitiva.* México: UAM, INAH y ENAH del Norte de México.

Pérez, E. (2004). *Recetario mixe de Oaxaca*. México: Dirección General de Culturas Populares, Consejo Nacional para la Cultura y las Artes.

Rakhshandehroo, E., Asadpour, M., Jafari, A., and Malekpour, S. H. (2016). The Effectiveness of Cinnamomum zeylanicum, Punica granatum Flower and Capsicum annuum Extracts Against Parascaris equorum Infective Larvae. *Istanb. Üniversitesi Vet. Fakültesi Derg.* 42, 132–137. <http://dx.doi.org/10.16988/iuvfd.2016.91882>

Roys, R. L. (1931). *The ethno-botany of the Maya*. New Orleans: Tulane University.

Roys, R. L. (1931). *The ethno-botany of the Maya*. New Orleans: Tulane University.

Ruiz N. N.C. and Vásquez D. M. A. (in press). “Etnoecología zapoteca del chile de campo (*Capsicum annuum* var. *glabriusculum*, Solanaceae) en San Juan Guelavía, Tlacolula, Oaxaca, México,” in *Los chiles que le dan sabor al mundo. Contribuciones multidisciplinarias.* (Xalapa, Veracruz, México: Universidad Veracruzana, ITAO e IRD).

Santano González Villalobos (2004). *Recetario indígena de Guerrero*. México: Consejo Nacional para la Cultura y las Artes.

Sharma, S. K., Vij, A. S., and Sharma, M. (2013). Mechanisms and clinical uses of capsaicin. *Eur. J. Pharmacol.* 720, 55–62. doi: <https://doi.org/10.1016/j.ejphar.2013.10.053>

Sousa, A. M., Carro, L., Velàzquez, E., Albuquerque, C., and Silva, L. R. (2016). Bioactive Compounds from Capsicum annuum as Health Promoters. *Nat. Bioact. Compd. Fruits Veg. Health Promot. Part II*, 92.
